# Supplementary material
Source: PubMed Central journal article supplement (PMC4788080)

1 **Figure 1. Model**

2  
3

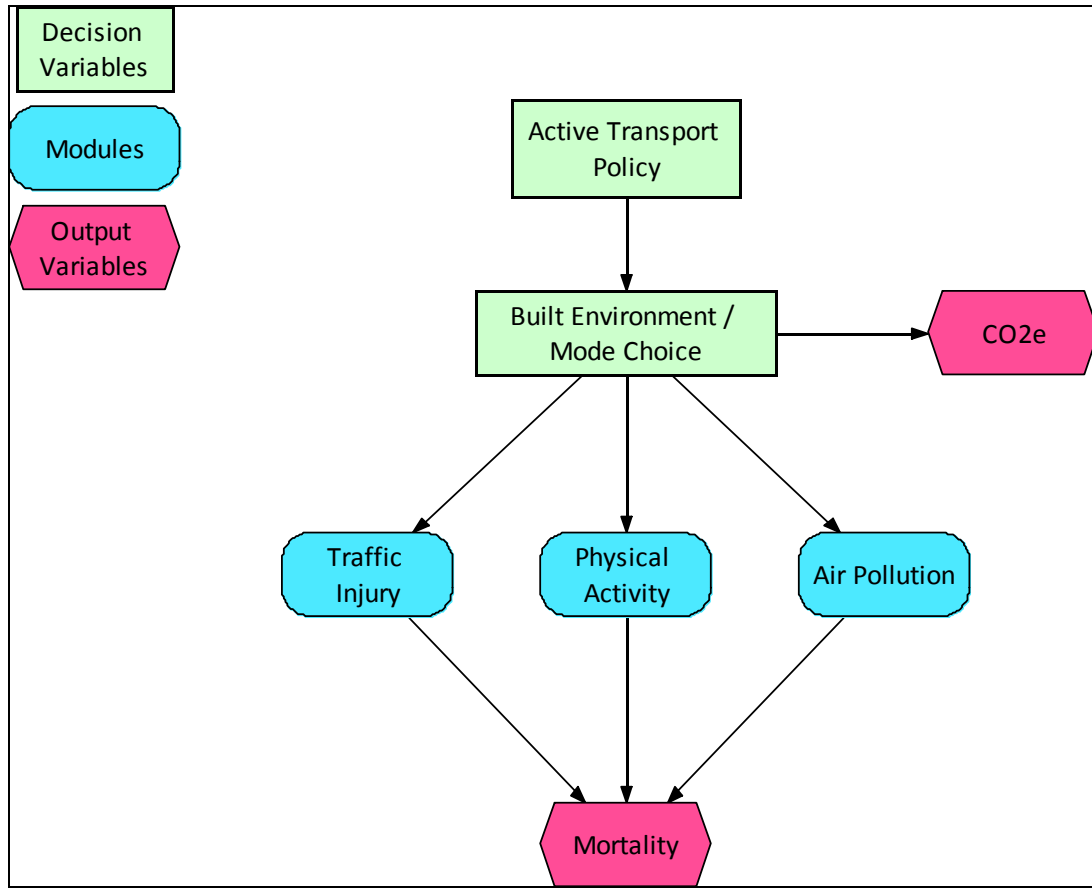

4

Supplement: rojd852889.wf1_default.pdf [file rojd852889.wf1_default.pdf]
